# Supplementary material for: An objective method for the production of isopach maps and implications for the estimation of tephra deposit volumes and their uncertainties
Source: PubMed Central journal article supplement (PMC4498447; doi:10.1007/s00445-015-0942-y), 2015-06-17

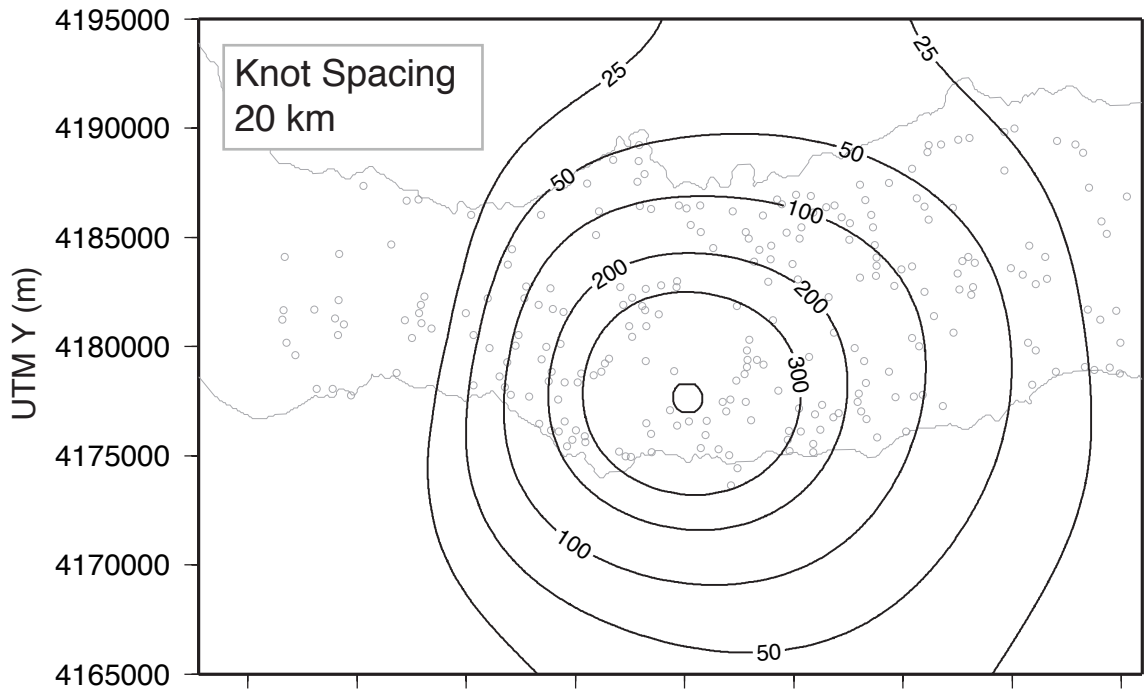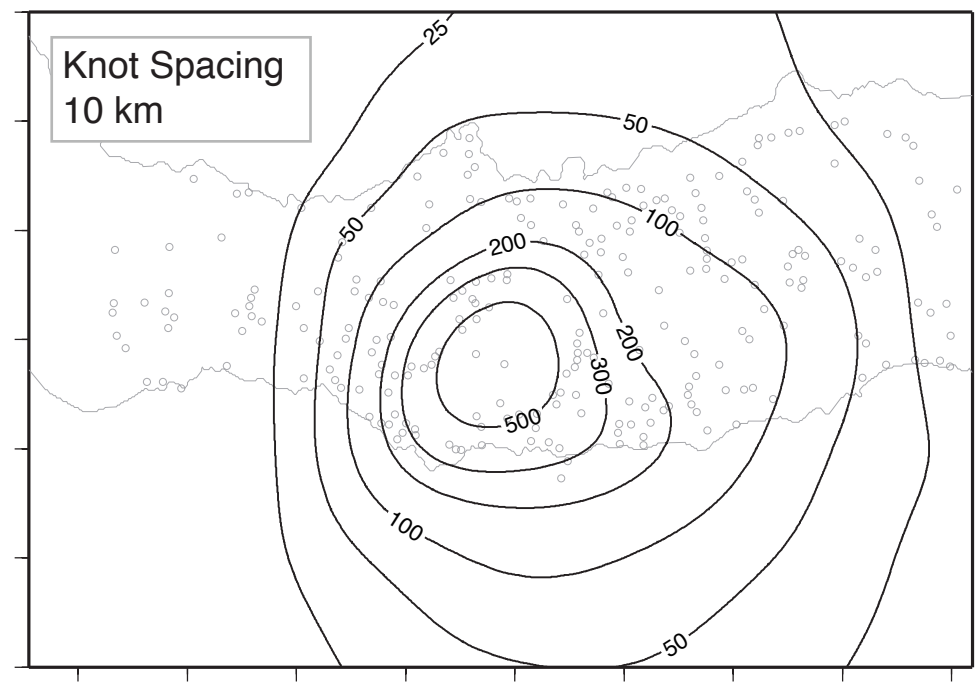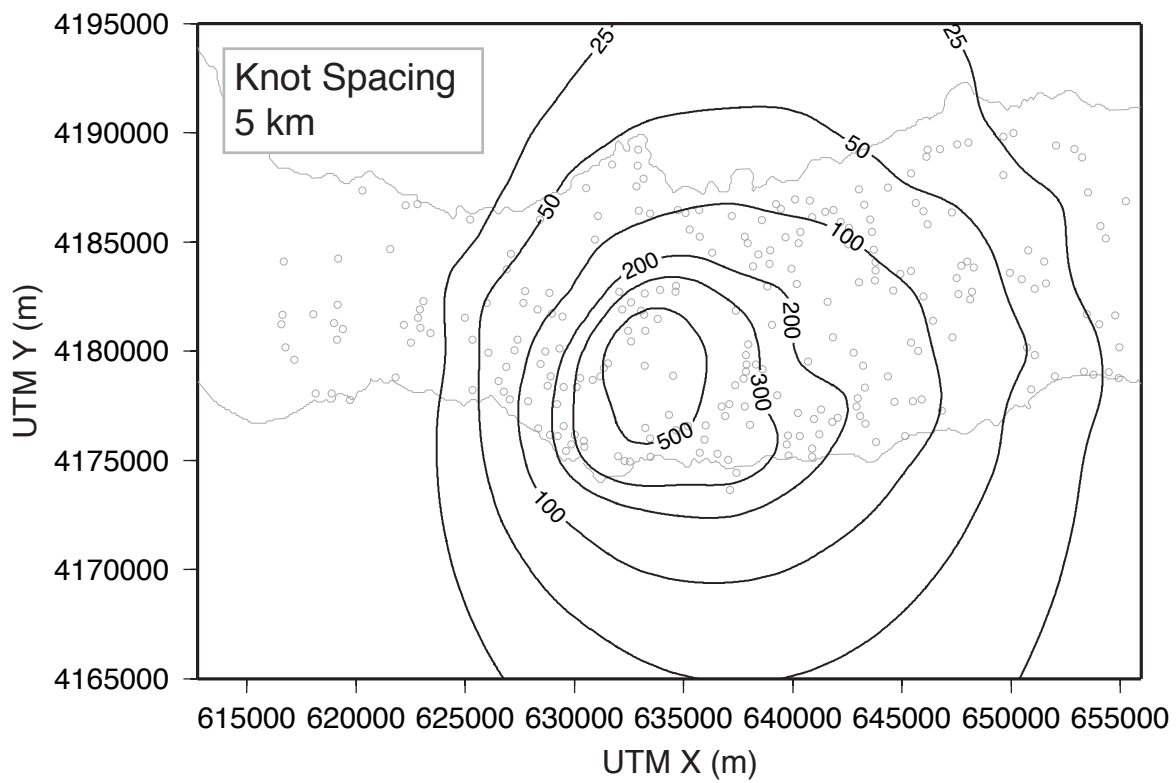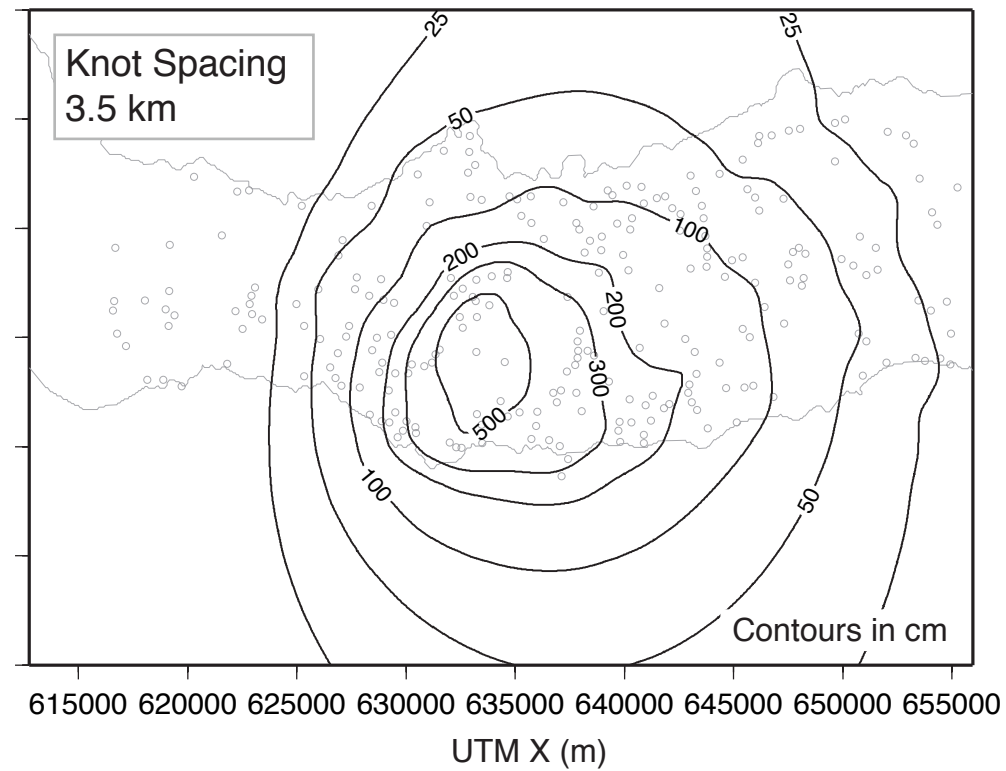

Supplement: 445_2015_942_MOESM3_ESM.pdf [file 445_2015_942_MOESM3_ESM.pdf]
